# Supplementary material
Source: publisher figshare collection journal article supplement (https://acs.figshare.com/ndownloader/files/3920194)
Supplement: Supplementary file 1 [file 3920194]

 
data_0120b-1 
 
_audit_creation_method            SHELXL-97 
_chemical_name_systematic 
; 
 ? 
; 
_chemical_name_common             ? 
_chemical_melting_point           ? 
_chemical_formula_moiety          'C19 H22 N2 O4' 
_chemical_formula_sum 
 'C19 H22 N2 O4' 
_chemical_formula_weight          342.39 
 
loop_ 
 _atom_type_symbol 
 _atom_type_description 
 _atom_type_scat_dispersion_real 
 _atom_type_scat_dispersion_imag 
 _atom_type_scat_source 
 'C'  'C'   0.0033   0.0016 
 'International Tables Vol C Tables 4.2.6.8 and 6.1.1.4' 
 'H'  'H'   0.0000   0.0000 
 'International Tables Vol C Tables 4.2.6.8 and 6.1.1.4' 
 'N'  'N'   0.0061   0.0033 
 'International Tables Vol C Tables 4.2.6.8 and 6.1.1.4' 
 'O'  'O'   0.0106   0.0060 
 'International Tables Vol C Tables 4.2.6.8 and 6.1.1.4' 
 
_symmetry_cell_setting            Monoclinic
_symmetry_space_group_name_H-M    P2(1)/c
 
loop_ 
 _symmetry_equiv_pos_as_xyz 
 'x, y, z' 
 '-x, y+1/2, -z+1/2' 
 '-x, -y, -z' 
 'x, -y-1/2, z-1/2' 
 
_cell_length_a                    7.297(2) 
_cell_length_b                    12.192(4) 
_cell_length_c                    19.971(6) 
_cell_angle_alpha                 90.00 
_cell_angle_beta                  94.898(4) 
_cell_angle_gamma                 90.00 
_cell_volume                      1770.2(9) 
_cell_formula_units_Z             4 
_cell_measurement_temperature     120(2) 
_cell_measurement_reflns_used     23250 
_cell_measurement_theta_min       1.96
_cell_measurement_theta_max       29.24
 
_exptl_crystal_description        'platy'
_exptl_crystal_colour             'white'
_exptl_crystal_size_max           0.19 
_exptl_crystal_size_mid           0.08 
_exptl_crystal_size_min           0.07 
_exptl_crystal_density_meas       'not measured'
_exptl_crystal_density_diffrn     1.285 
_exptl_crystal_density_method     'not measured' 
_exptl_crystal_F_000              728 
_exptl_absorpt_coefficient_mu     0.091 
_exptl_absorpt_correction_type    'multi-scan'
_exptl_absorpt_correction_T_min   0.9830 
_exptl_absorpt_correction_T_max   0.9937 
_exptl_absorpt_process_details    'SADABS'
 
_exptl_special_details 
; 
 ? 
; 
 
_diffrn_ambient_temperature       120(2) 
_diffrn_radiation_wavelength      0.71073 
_diffrn_radiation_type            MoK\a 
_diffrn_radiation_source          'fine-focus sealed tube' 
_diffrn_radiation_monochromator   graphite 
_diffrn_measurement_device_type   'CCD area detector' 
_diffrn_measurement_method        'phi and omega scans' 
_diffrn_detector_area_resol_mean  ? 
_diffrn_standards_number          ? 
_diffrn_standards_interval_count  ? 
_diffrn_standards_interval_time   ? 
_diffrn_standards_decay_%         ? 
_diffrn_reflns_number             23250 
_diffrn_reflns_av_R_equivalents   0.0452 
_diffrn_reflns_av_sigmaI/netI     0.0377 
_diffrn_reflns_limit_h_min        -9 
_diffrn_reflns_limit_h_max        9 
_diffrn_reflns_limit_k_min        -16 
_diffrn_reflns_limit_k_max        16 
_diffrn_reflns_limit_l_min        -27 
_diffrn_reflns_limit_l_max        27 
_diffrn_reflns_theta_min          1.96 
_diffrn_reflns_theta_max          29.24 
_reflns_number_total              4428 
_reflns_number_gt                 3283 
_reflns_threshold_expression      >2sigma(I) 
 
_computing_data_collection        'Bruker SMART' 
_computing_cell_refinement        'Bruker SMART' 
_computing_data_reduction         'Bruker SAINT' 
_computing_structure_solution     'SHELXS-97 (Sheldrick, 1990)' 
_computing_structure_refinement   'SHELXL-97 (Sheldrick, 1997)' 
_computing_molecular_graphics     'Bruker SHELXTL' 
_computing_publication_material   'Bruker SHELXTL' 
 
_refine_special_details 
; 
 Refinement of F^2^ against ALL reflections.  The weighted R-factor wR and 
 goodness of fit S are based on F^2^, conventional R-factors R are based 
 on F, with F set to zero for negative F^2^. The threshold expression of 
 F^2^ > 2sigma(F^2^) is used only for calculating R-factors(gt) etc. and is 
 not relevant to the choice of reflections for refinement.  R-factors based 
 on F^2^ are statistically about twice as large as those based on F, and R- 
 factors based on ALL data will be even larger. 
; 
 
_refine_ls_structure_factor_coef  Fsqd  
_refine_ls_matrix_type            full 
_refine_ls_weighting_scheme       calc  
_refine_ls_weighting_details 
 'calc w=1/[\s^2^(Fo^2^)+(0.0813P)^2^+4.0802P] where P=(Fo^2^+2Fc^2^)/3' 
_atom_sites_solution_primary      direct 
_atom_sites_solution_secondary    difmap 
_atom_sites_solution_hydrogens    geom 
_refine_ls_hydrogen_treatment     constr 
_refine_ls_extinction_method      none 
_refine_ls_extinction_coef        ? 
_refine_ls_number_reflns          4428 
_refine_ls_number_parameters      226 
_refine_ls_number_restraints      0 
_refine_ls_R_factor_all           0.0943 
_refine_ls_R_factor_gt            0.0708 
_refine_ls_wR_factor_ref          0.2463 
_refine_ls_wR_factor_gt           0.2269 
_refine_ls_goodness_of_fit_ref    1.176 
_refine_ls_restrained_S_all       1.176 
_refine_ls_shift/su_max           0.000 
_refine_ls_shift/su_mean          0.000 
 
loop_ 
 _atom_site_label 
 _atom_site_type_symbol 
 _atom_site_fract_x 
 _atom_site_fract_y 
 _atom_site_fract_z 
 _atom_site_U_iso_or_equiv 
 _atom_site_adp_type 
 _atom_site_occupancy 
 _atom_site_symmetry_multiplicity 
 _atom_site_calc_flag 
 _atom_site_refinement_flags 
 _atom_site_disorder_assembly 
 _atom_site_disorder_group 
O2 O 0.2611(3) 0.94814(16) 0.03541(10) 0.0216(5) Uani 1 1 d . . . 
O1 O 0.2937(4) 0.85584(19) 0.13452(11) 0.0346(6) Uani 1 1 d . . . 
O4 O 0.1975(3) 0.38514(18) 0.22150(11) 0.0278(5) Uani 1 1 d . . . 
O3 O 0.1482(5) 0.5600(2) 0.24894(12) 0.0437(7) Uani 1 1 d . . . 
N1 N 0.2081(4) 0.6982(2) -0.09425(12) 0.0234(6) Uani 1 1 d . . . 
C11 C 0.2325(4) 0.6579(2) 0.05172(14) 0.0199(6) Uani 1 1 d . . . 
N2 N 0.2421(4) 0.7684(2) 0.03277(12) 0.0225(6) Uani 1 1 d . . . 
H2B H 0.2299 0.7820 -0.0107 0.027 Uiso 1 1 calc R . . 
C8 C 0.2054(4) 0.4356(3) 0.08713(15) 0.0236(6) Uani 1 1 d . . . 
H8A H 0.1967 0.3604 0.0990 0.028 Uiso 1 1 calc R . . 
C6 C 0.2417(4) 0.5754(2) 0.00175(14) 0.0195(6) Uani 1 1 d . . . 
C12 C 0.2680(4) 0.8573(2) 0.07402(14) 0.0211(6) Uani 1 1 d . . . 
C5 C 0.2637(4) 0.5995(2) -0.07066(14) 0.0201(6) Uani 1 1 d . . . 
C1 C 0.2210(5) 0.7205(3) -0.15942(15) 0.0264(7) Uani 1 1 d . . . 
H1A H 0.1818 0.7905 -0.1759 0.032 Uiso 1 1 calc R . . 
C10 C 0.2099(4) 0.6269(2) 0.11773(14) 0.0220(6) Uani 1 1 d . . . 
H10A H 0.2029 0.6819 0.1511 0.026 Uiso 1 1 calc R . . 
C7 C 0.2261(4) 0.4659(3) 0.02138(15) 0.0236(6) Uani 1 1 d . . . 
H7A H 0.2299 0.4101 -0.0117 0.028 Uiso 1 1 calc R . . 
C9 C 0.1975(4) 0.5174(2) 0.13554(14) 0.0212(6) Uani 1 1 d . . . 
C4 C 0.3374(4) 0.5215(3) -0.11203(15) 0.0247(6) Uani 1 1 d . . . 
H4A H 0.3805 0.4530 -0.0943 0.030 Uiso 1 1 calc R . . 
C17 C 0.1785(5) 0.4915(3) 0.20741(15) 0.0251(7) Uani 1 1 d . . . 
C2 C 0.2888(5) 0.6465(3) -0.20408(15) 0.0281(7) Uani 1 1 d . . . 
H2A H 0.2951 0.6649 -0.2501 0.034 Uiso 1 1 calc R . . 
C3 C 0.3466(5) 0.5458(3) -0.17945(16) 0.0286(7) Uani 1 1 d . . . 
H3A H 0.3927 0.4929 -0.2086 0.034 Uiso 1 1 calc R . . 
C13 C 0.2703(4) 1.0583(2) 0.06622(15) 0.0225(6) Uani 1 1 d . . . 
C18 C 0.1836(6) 0.3550(3) 0.29137(17) 0.0353(8) Uani 1 1 d . . . 
H18A H 0.0558 0.3651 0.3034 0.042 Uiso 1 1 calc R . . 
H18B H 0.2659 0.4016 0.3213 0.042 Uiso 1 1 calc R . . 
C14 C 0.1067(5) 1.0749(3) 0.10775(18) 0.0315(7) Uani 1 1 d . . . 
H14A H -0.0077 1.0624 0.0794 0.047 Uiso 1 1 calc R . . 
H14B H 0.1081 1.1500 0.1252 0.047 Uiso 1 1 calc R . . 
H14C H 0.1146 1.0229 0.1453 0.047 Uiso 1 1 calc R . . 
C15 C 0.4524(5) 1.0760(3) 0.10757(18) 0.0329(8) Uani 1 1 d . . . 
H15A H 0.5538 1.0640 0.0792 0.049 Uiso 1 1 calc R . . 
H15B H 0.4629 1.0242 0.1452 0.049 Uiso 1 1 calc R . . 
H15C H 0.4579 1.1512 0.1250 0.049 Uiso 1 1 calc R . . 
C16 C 0.2560(5) 1.1329(3) 0.00476(17) 0.0315(8) Uani 1 1 d . . . 
H16A H 0.1381 1.1202 -0.0214 0.047 Uiso 1 1 calc R . . 
H16B H 0.3569 1.1167 -0.0231 0.047 Uiso 1 1 calc R . . 
H16C H 0.2637 1.2096 0.0193 0.047 Uiso 1 1 calc R . . 
C19 C 0.2387(7) 0.2372(3) 0.2990(2) 0.0478(10) Uani 1 1 d . . . 
H19A H 0.2299 0.2141 0.3456 0.072 Uiso 1 1 calc R . . 
H19B H 0.3657 0.2283 0.2874 0.072 Uiso 1 1 calc R . . 
H19C H 0.1567 0.1919 0.2690 0.072 Uiso 1 1 calc R . . 
 
loop_ 
 _atom_site_aniso_label 
 _atom_site_aniso_U_11 
 _atom_site_aniso_U_22 
 _atom_site_aniso_U_33 
 _atom_site_aniso_U_23 
 _atom_site_aniso_U_13 
 _atom_site_aniso_U_12 
O2 0.0342(12) 0.0133(10) 0.0176(9) -0.0002(8) 0.0040(8) -0.0008(8) 
O1 0.0661(18) 0.0205(12) 0.0170(10) 0.0000(9) 0.0017(10) -0.0046(11) 
O4 0.0400(13) 0.0194(11) 0.0247(11) 0.0073(9) 0.0064(9) 0.0007(10) 
O3 0.088(2) 0.0236(13) 0.0216(12) -0.0004(10) 0.0143(13) 0.0010(13) 
N1 0.0305(14) 0.0211(13) 0.0188(12) 0.0001(10) 0.0023(10) -0.0016(11) 
C11 0.0241(14) 0.0162(14) 0.0194(13) -0.0002(10) 0.0018(11) 0.0000(11) 
N2 0.0381(15) 0.0144(12) 0.0154(11) 0.0001(9) 0.0040(10) -0.0005(11) 
C8 0.0281(16) 0.0182(14) 0.0246(14) 0.0012(11) 0.0030(12) -0.0022(12) 
C6 0.0216(14) 0.0188(14) 0.0180(13) -0.0008(10) 0.0013(10) 0.0005(11) 
C12 0.0290(15) 0.0156(14) 0.0189(13) -0.0003(10) 0.0038(11) 0.0012(11) 
C5 0.0214(14) 0.0192(14) 0.0194(13) -0.0018(11) -0.0006(10) -0.0031(11) 
C1 0.0340(17) 0.0262(17) 0.0191(14) 0.0011(12) 0.0018(12) 0.0002(13) 
C10 0.0298(16) 0.0172(14) 0.0194(13) -0.0007(11) 0.0052(11) 0.0026(12) 
C7 0.0289(16) 0.0179(15) 0.0239(14) -0.0022(11) 0.0011(12) 0.0000(12) 
C9 0.0250(15) 0.0196(15) 0.0194(13) 0.0028(11) 0.0042(11) 0.0003(11) 
C4 0.0278(16) 0.0229(16) 0.0233(14) -0.0021(12) 0.0019(12) 0.0012(12) 
C17 0.0323(17) 0.0201(15) 0.0230(14) 0.0049(12) 0.0029(12) -0.0006(12) 
C2 0.0327(17) 0.0340(18) 0.0174(13) -0.0012(12) 0.0006(12) -0.0055(14) 
C3 0.0312(17) 0.0329(18) 0.0224(14) -0.0080(13) 0.0065(12) 0.0008(14) 
C13 0.0309(16) 0.0124(13) 0.0248(14) -0.0027(11) 0.0055(12) 0.0004(12) 
C18 0.053(2) 0.0294(18) 0.0237(16) 0.0083(13) 0.0033(15) -0.0066(16) 
C14 0.0371(19) 0.0224(16) 0.0370(18) -0.0031(13) 0.0150(14) 0.0014(14) 
C15 0.0364(19) 0.0280(18) 0.0340(17) -0.0079(14) 0.0009(14) -0.0055(14) 
C16 0.046(2) 0.0178(15) 0.0314(17) 0.0020(13) 0.0086(15) 0.0008(14) 
C19 0.062(3) 0.032(2) 0.049(2) 0.0185(18) 0.002(2) 0.0028(19) 
 
_geom_special_details 
; 
 All esds (except the esd in the dihedral angle between two l.s. planes) 
 are estimated using the full covariance matrix.  The cell esds are taken 
 into account individually in the estimation of esds in distances, angles 
 and torsion angles; correlations between esds in cell parameters are only 
 used when they are defined by crystal symmetry.  An approximate (isotropic) 
 treatment of cell esds is used for estimating esds involving l.s. planes. 
; 
 
loop_ 
 _geom_bond_atom_site_label_1 
 _geom_bond_atom_site_label_2 
 _geom_bond_distance 
 _geom_bond_site_symmetry_2 
 _geom_bond_publ_flag 
O2 C12 1.348(3) . ? 
O2 C13 1.476(3) . ? 
O1 C12 1.207(4) . ? 
O4 C17 1.332(4) . ? 
O4 C18 1.455(4) . ? 
O3 C17 1.210(4) . ? 
N1 C1 1.341(4) . ? 
N1 C5 1.343(4) . ? 
C11 C10 1.394(4) . ? 
C11 N2 1.403(4) . ? 
C11 C6 1.422(4) . ? 
N2 C12 1.364(4) . ? 
C8 C7 1.385(4) . ? 
C8 C9 1.394(4) . ? 
C6 C7 1.400(4) . ? 
C6 C5 1.497(4) . ? 
C5 C4 1.397(4) . ? 
C1 C2 1.389(5) . ? 
C10 C9 1.387(4) . ? 
C9 C17 1.487(4) . ? 
C4 C3 1.386(4) . ? 
C2 C3 1.376(5) . ? 
C13 C15 1.518(5) . ? 
C13 C16 1.524(4) . ? 
C13 C14 1.524(4) . ? 
C18 C19 1.496(5) . ? 
 
loop_ 
 _geom_angle_atom_site_label_1 
 _geom_angle_atom_site_label_2 
 _geom_angle_atom_site_label_3 
 _geom_angle 
 _geom_angle_site_symmetry_1 
 _geom_angle_site_symmetry_3 
 _geom_angle_publ_flag 
C12 O2 C13 120.7(2) . . ? 
C17 O4 C18 115.7(3) . . ? 
C1 N1 C5 118.6(3) . . ? 
C10 C11 N2 121.8(3) . . ? 
C10 C11 C6 119.2(3) . . ? 
N2 C11 C6 118.9(3) . . ? 
C12 N2 C11 127.4(2) . . ? 
C7 C8 C9 118.8(3) . . ? 
C7 C6 C11 117.9(3) . . ? 
C7 C6 C5 118.4(3) . . ? 
C11 C6 C5 123.7(3) . . ? 
O1 C12 O2 125.4(3) . . ? 
O1 C12 N2 126.5(3) . . ? 
O2 C12 N2 108.1(2) . . ? 
N1 C5 C4 121.5(3) . . ? 
N1 C5 C6 117.4(3) . . ? 
C4 C5 C6 121.1(3) . . ? 
N1 C1 C2 123.4(3) . . ? 
C9 C10 C11 121.2(3) . . ? 
C8 C7 C6 122.6(3) . . ? 
C10 C9 C8 120.2(3) . . ? 
C10 C9 C17 117.7(3) . . ? 
C8 C9 C17 122.0(3) . . ? 
C3 C4 C5 118.8(3) . . ? 
O3 C17 O4 123.2(3) . . ? 
O3 C17 C9 123.6(3) . . ? 
O4 C17 C9 113.2(3) . . ? 
C3 C2 C1 117.7(3) . . ? 
C2 C3 C4 120.0(3) . . ? 
O2 C13 C15 111.3(3) . . ? 
O2 C13 C16 102.1(2) . . ? 
C15 C13 C16 110.5(3) . . ? 
O2 C13 C14 109.7(2) . . ? 
C15 C13 C14 112.0(3) . . ? 
C16 C13 C14 110.8(3) . . ? 
O4 C18 C19 107.4(3) . . ? 
 
_diffrn_measured_fraction_theta_max    0.921 
_diffrn_reflns_theta_full              25.00 
_diffrn_measured_fraction_theta_full   0.999 
_refine_diff_density_max    0.467 
_refine_diff_density_min   -0.381 
_refine_diff_density_rms    0.100 
